# Supplementary material for: Cu-Sn Aerogels for Electrochemical CO2 Reduction with High CO Selectivity
Source: MDPI journal article supplement (doi:10.3390/molecules28031033), 2023-01-19
Supplement: s1 [file s1]

# **Cu-Sn Aerogels for Electrochemical CO<sub>2</sub> Reduction with High CO Selectivity**

Yexin Pan <sup>1</sup>, Muchen Wu <sup>1</sup>, Ziran Ye <sup>2,\*</sup>, Haibin Tang <sup>3</sup>, Zhanglian Hong <sup>1</sup> and Mingjia Zhi <sup>4,\*</sup>

<sup>1</sup> State Key Laboratory of Silicon Material, School of Materials Science and Engineering, Zhejiang University, 38 Zheda Road, Hangzhou, 310027, China

<sup>2</sup> Department of Applied Physics, Zhejiang University of Technology, Hangzhou, 310014, China

<sup>3</sup> Key Laboratory of Materials Physics, and Anhui Key Laboratory of Nanomaterials and Nanotechnology, Hefei Institute of Solid State Physics, Chinese Academy of Sciences, Hefei, 230031, China

<sup>4</sup> Institute for Composites Science Innovation (InCSI), Zhejiang University, 38 Zheda Road, Hangzhou 310027, China

\*Corresponding authors: E-mail: yeziran@zjut.edu.cn; Mingjia\_zhi@zju.edu.cn

**Table S1.** Chemicals used in the synthesis of the hydrogels

| <b>Cu<sub>x</sub>Sn<sub>y</sub> aerogels</b> | <b>CuCl<sub>2</sub> (mM)</b> | <b>SnCl<sub>4</sub> (mM)</b> | <b>Atomic Composition<br/>determined by ICP-AES</b> |
|----------------------------------------------|------------------------------|------------------------------|-----------------------------------------------------|
| Cu                                           | 0.840                        | 0                            | Cu 100%                                             |
| Cu <sub>97</sub> Sn <sub>3</sub>             | 0.798                        | 0.042                        | Cu:Sn=97:3                                          |
| Cu <sub>95</sub> Sn <sub>5</sub>             | 0.756                        | 0.084                        | Cu:Sn=95:5                                          |
| Cu <sub>90</sub> Sn <sub>10</sub>            | 0.672                        | 0.168                        | Cu:Sn=90:10                                         |
| Sn                                           | 0                            | 0.840                        | Sn 100%                                             |

## Calculations of Faradaic efficiencies of gaseous products

The volume of the sample loop ( $V_0$ ) for the gaseous product in our gas chromatograph is  $1 \text{ cm}^3$  and the flow rate of the gas  $v = 20 \text{ cm}^3/\text{min}$ . The time it takes to fill the sample loop is:

$$t = \frac{V_0}{v} = \frac{1 \text{ cm}^3}{20 \text{ cm}^3/\text{min}} = 0.05 \text{ min} = 3 \text{ s} \quad (1)$$

According to the ideal gas law, under the ambient temperature of  $25^\circ\text{C}$ , the amount of gas in each vial ( $V_0 = 1 \text{ cm}^3$ ) is:

$$n = \frac{P * V_0}{R * T} = \frac{1.013 * 10^5 \text{ Pa} * 1 * 10^{-6} \text{ m}^3}{8.314 \text{ J} \cdot \text{K}^{-1} \cdot \text{mol}^{-1} * 298.150 \text{ K}} = 4.086 * 10^{-5} \text{ mol} \quad (2)$$

The number of electrons required to form 1 molecule of CO, CH<sub>4</sub>, C<sub>2</sub>H<sub>4</sub>, or C<sub>2</sub>H<sub>6</sub> is respectively 2, 8, 12, or 14. Take **Vial 3** and the calculation of **CO** as an example.

The number of electrons ( $N_{\text{CO}}$ ) needed to get  $x_0$  ppm of CO is:

$$\begin{aligned} N_{\text{CO}} &= x_0 * n * N_A * 2e \\ &= 2514.639 * 10^{-6} * 4.086 * 10^{-5} \text{ mol} * 6.02 * 10^{23} \text{ mol}^{-1} * 2e \\ &= 1.237 * 10^{17} e \end{aligned} \quad (3)$$

At the injection time to fill up vial 3, for example, the recorded current is  $I_0 = 7.08$  mA (this data is obtained from the chronoamperogram). The total number of electrons ( $N_{\text{total}}$ ) measured during this sampling period:

$$N_{\text{total}} = \frac{I_0 * t}{e} = \frac{7.08 * 10^{-3} \text{ A} * 3 \text{ s}}{1.602 * 10^{-19} \text{ C}/e} = 1.326 * 10^{17} e \quad (4)$$

Hence, the faradic efficiency of CO is **(3)/(4)**:

$$\text{FE} = \frac{N_{\text{CO}}}{N_{\text{total}}} * 100\% = \frac{1.237 * 10^{17}}{1.326 * 10^{17}} = 93.28\% \quad (5)$$

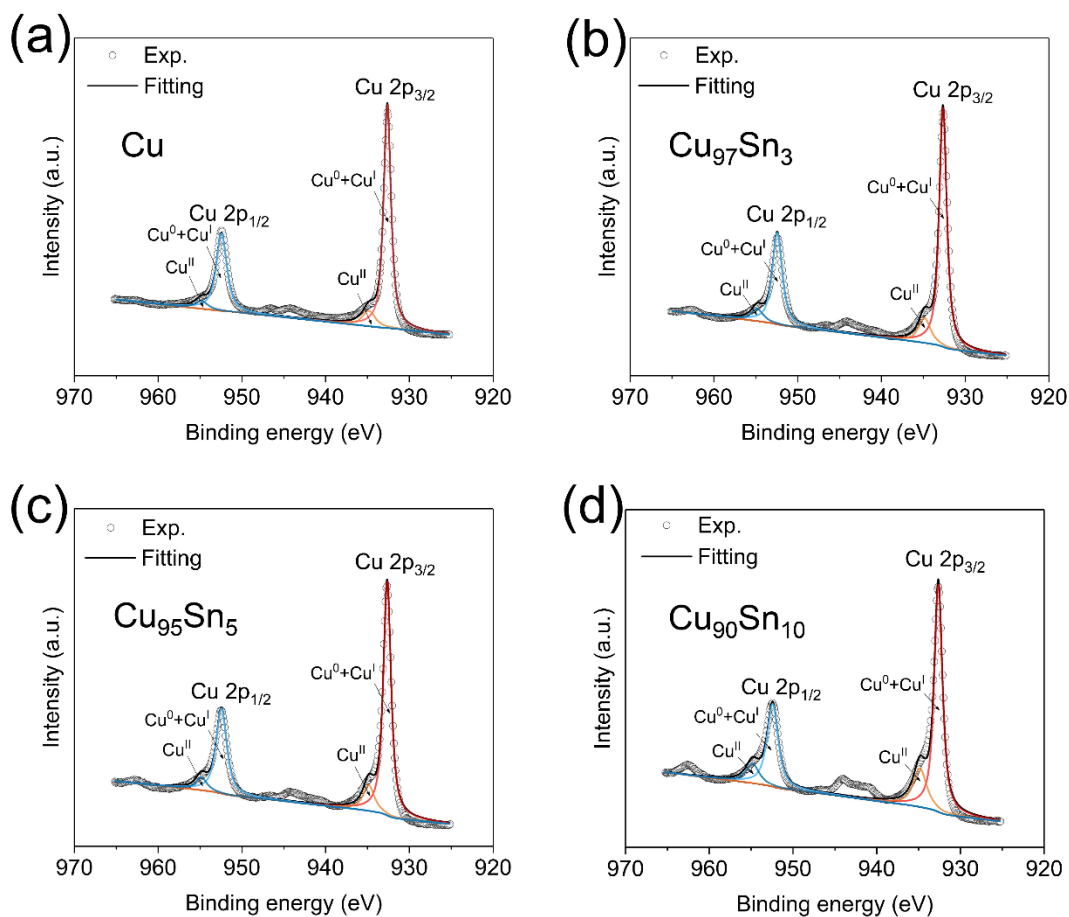

**Figure S1.** Cu 2p core level scan of the prepared aerogels: (a) Cu, (b) Cu<sub>97</sub>Sn<sub>3</sub>, (c) Cu<sub>95</sub>Sn<sub>5</sub>, and (d) Cu<sub>90</sub>Sn<sub>10</sub>.

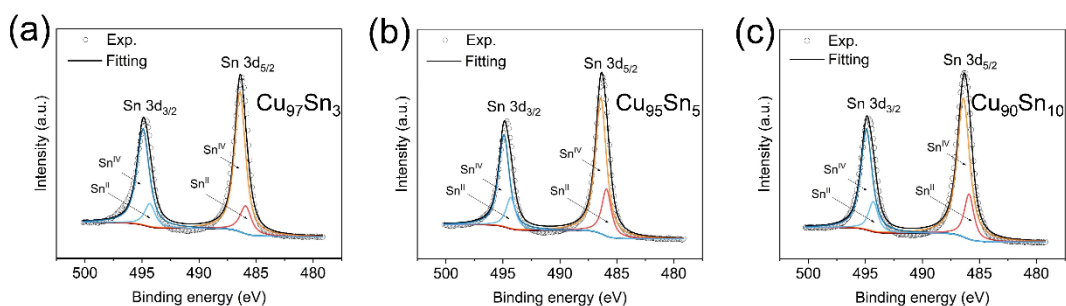

**Figure S2.** Sn 3d core level scan of prepared aerogels: (a) Cu<sub>97</sub>Sn<sub>3</sub>, (b) Cu<sub>95</sub>Sn<sub>5</sub>, and (c) Cu<sub>90</sub>Sn<sub>10</sub>.

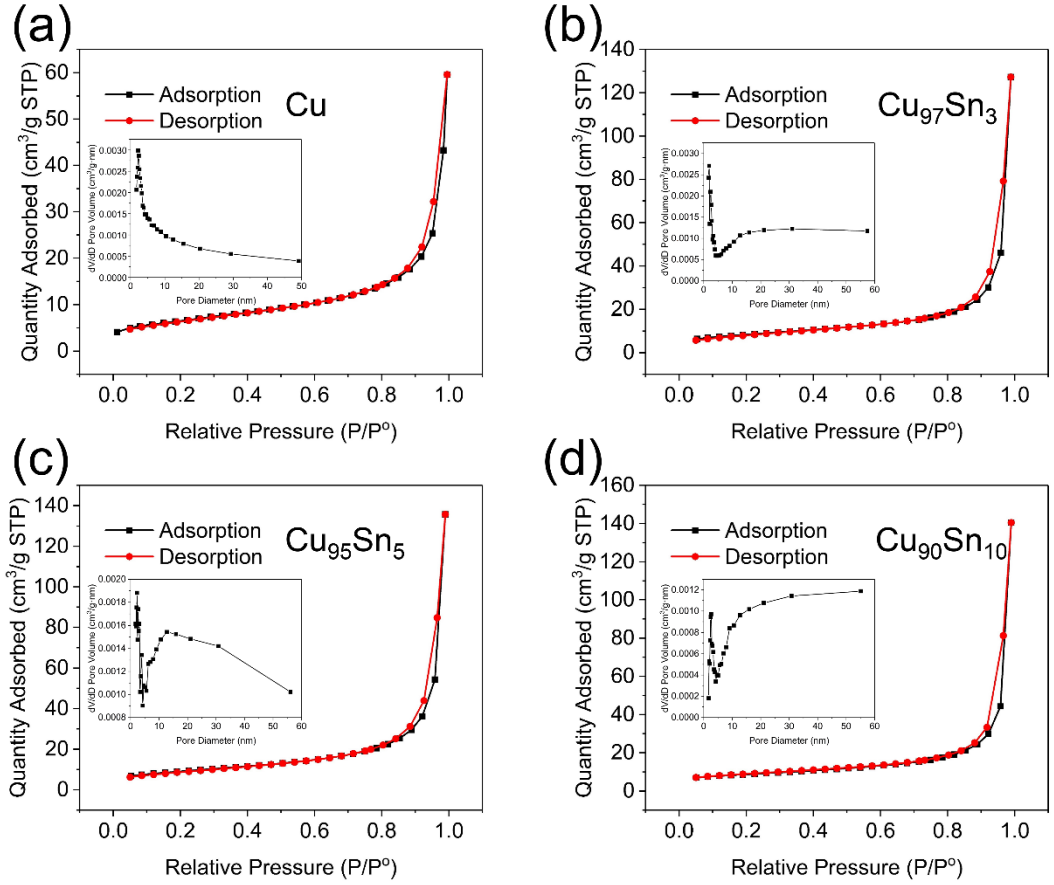

**Figure S3.** N<sub>2</sub> physisorption isotherms for the as-prepared aerogels: (a) Cu, (b) Cu<sub>97</sub>Sn<sub>3</sub>, (c) Cu<sub>95</sub>Sn<sub>5</sub>, and (d) Cu<sub>90</sub>Sn<sub>10</sub>.

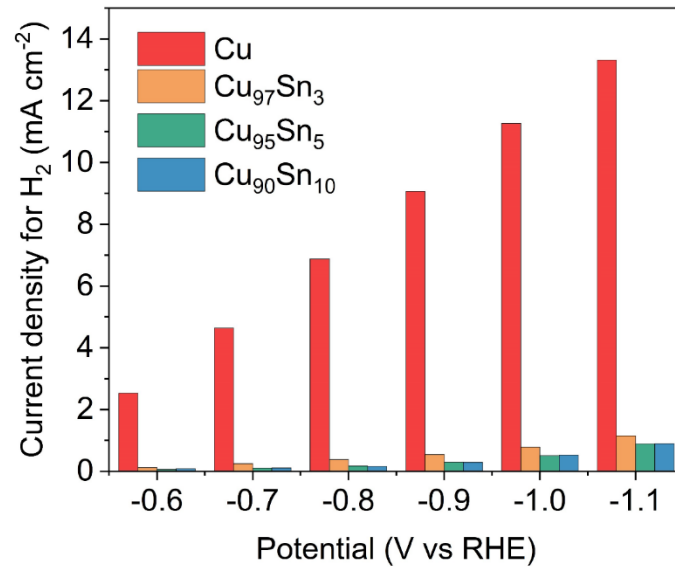

**Figure S4.** H<sub>2</sub> partial current density at different potentials for Cu, Cu<sub>97</sub>Sn<sub>3</sub>, Cu<sub>95</sub>Sn<sub>5</sub>, Cu<sub>90</sub>Sn<sub>10</sub> aerogels.

**Table S2** The comparison of CO FE, total current density, and CO current density of different Cu based electrodes at different potentials

| Sample                                       | FE <sub>CO</sub> (%) | Total current density<br>(mA cm <sup>-2</sup> ) | CO current density<br>(mA cm <sup>-2</sup> ) |
|----------------------------------------------|----------------------|-------------------------------------------------|----------------------------------------------|
| -0.6 V <i>vs</i> RHE                         |                      |                                                 |                                              |
| Cu-In bimetal[1]                             | 90                   | 1.1                                             | 1.0                                          |
| Cu-Sn foam[2]                                | 90                   | 1.3                                             | 1.2                                          |
| Cu-Sn bimetal[3]                             | 92                   | 1.3                                             | 1.2                                          |
| Cu <sub>95</sub> Sn <sub>5</sub> (this work) | 87                   | 1.8                                             | 1.6                                          |
| -0.7 V <i>vs</i> RHE                         |                      |                                                 |                                              |
| Cu-In bimetal[1]                             | 90                   | 1.7                                             | 1.5                                          |
| Cu-Ag bimetal[4]                             | 46                   | 1.2                                             | 0.6                                          |
| Cu-Sn bimetal[3]                             | 90                   | 2.1                                             | 1.9                                          |
| Cu <sub>95</sub> Sn <sub>5</sub> (this work) | 90                   | 3.2                                             | 2.8                                          |
| -0.8 V <i>vs</i> RHE                         |                      |                                                 |                                              |
| Cu-Ag bimetal[4]                             | 74                   | 3.4                                             | 2.5                                          |
| Cu-Sn foam[2]                                | 91                   | 4.9                                             | 4.5                                          |
| Cu-Sn bimetal[3]                             | 92                   | 3.3                                             | 3.0                                          |
| Cu <sub>95</sub> Sn <sub>5</sub> (this work) | 92                   | 5.0                                             | 4.6                                          |
| -0.9 V <i>vs</i> RHE                         |                      |                                                 |                                              |
| Cu-Ag bimetal[4]                             | 90                   | 5.9                                             | 5.3                                          |
| Cu-Sn foam[2]                                | 91                   | 6.8                                             | 6.2                                          |
| Cu <sub>95</sub> Sn <sub>5</sub> (this work) | 93                   | 7.1                                             | 6.6                                          |

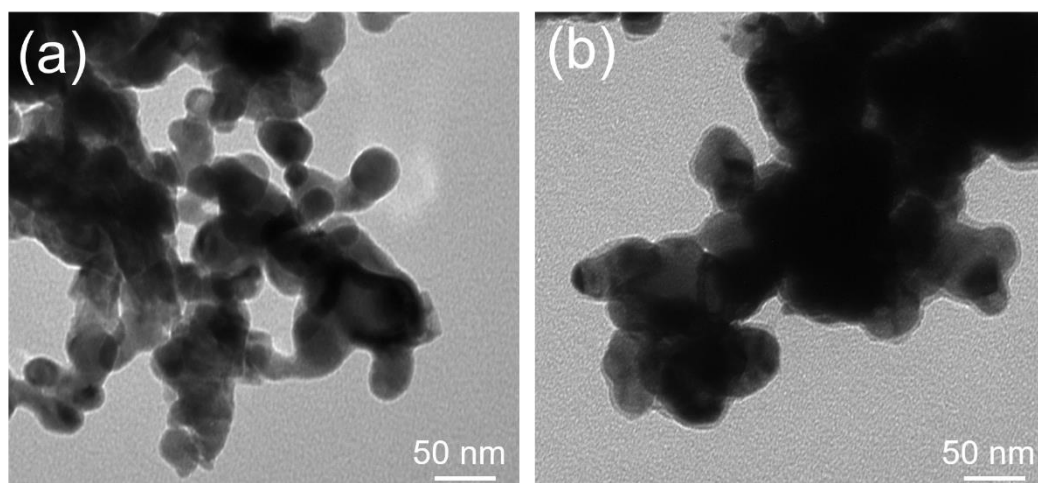

**Figure S5.** TEM images of  $\text{Cu}_{95}\text{Sn}_5$  aerogel electrode: (a) before electrolysis and (b) after 20 hours of electrolysis.

## DFT computations

All calculations were carried out using density functional theory as implemented in the CP2K package.[5] The generalized-gradient approximation (GGA), as parameterized by Perdew, Burke, and Ernzerhof (PBE) was utilized to compute the exchange-correlation energy.[6,7] Dispersion interactions were considered in calculations by using an empirical correction scheme developed by PBE (D3).[8] All atoms were described with the DZVP-MOLOPT-GTH pseudopotentials.[9]

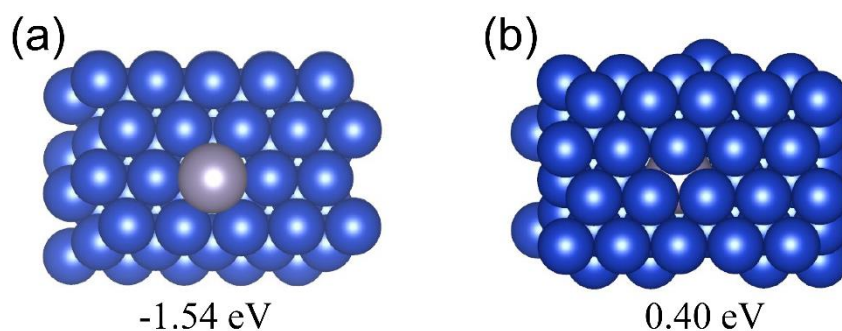

**Figure S6.** Possible positions of an Sn atom replacing a Cu atom on a Cu (100) structure to form a  $\text{Cu}_{99}\text{Sn}_1$  structure: (a) face, (b) inner.

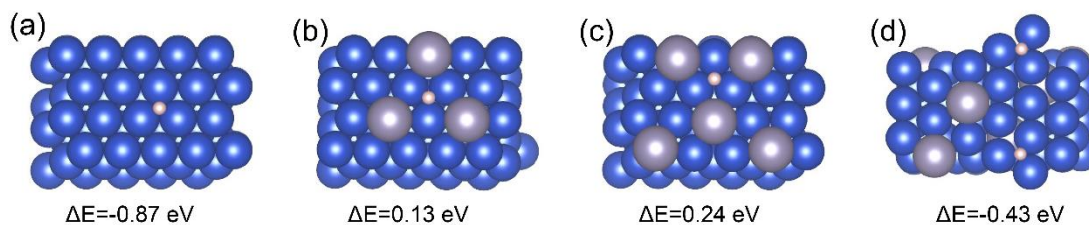

**Figure S7.** Free energies of H adsorbed on the (a) Cu, (b)  $\text{Cu}_{97}\text{Sn}_3$ , (c)  $\text{Cu}_{95}\text{Sn}_5$ , (d)  $\text{Cu}_{90}\text{Sn}_{10}$  (111) facet.

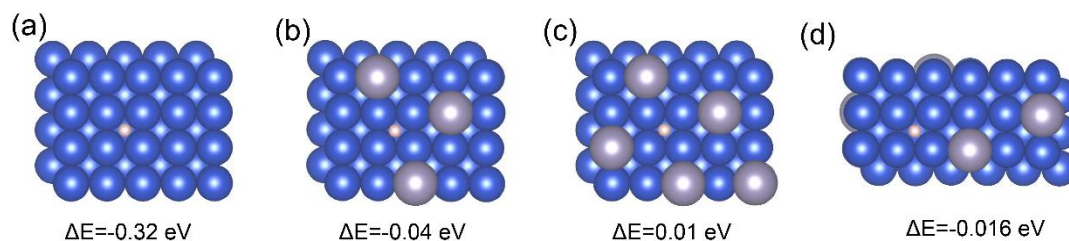

**Figure S8.** Free energies of H adsorbed on the (a) Cu, (b)  $\text{Cu}_{97}\text{Sn}_3$ , (c)  $\text{Cu}_{95}\text{Sn}_5$ , (d)  $\text{Cu}_{90}\text{Sn}_{10}$  (100) facet.



## References

1. Rasul S, Anjum DH, Jedidi A, Minenkov Y, Cavallo L, Takanabe K (2015) A Highly Selective Copper-Indium Bimetallic Electrocatalyst for the Electrochemical Reduction of Aqueous CO<sub>2</sub> to CO. *Angewandte Chemie-International Edition* 54 (7):2146-2150. doi:10.1002/anie.201410233
2. Zeng J, Bejtka K, Ju W, Castellino M, Chiodoni A, Sacco A, Farkhondehfal MA, Hernandez S, Rentsch D, Battaglia C, Pirri CF (2018) Advanced Cu-Sn foam for selectively converting CO<sub>2</sub> to CO in aqueous solution. *Applied Catalysis B-Environmental* 236:475-482. doi:10.1016/j.apcatb.2018.05.056
3. Sarfraz S, Garcia-Esparza AT, Jedidi A, Cavallo L, Takanabe K (2016) Cu-Sn Bimetallic Catalyst for Selective Aqueous Electroreduction of CO<sub>2</sub> to CO. *Acs Catalysis* 6 (5):2842-2851. doi:10.1021/acscatal.6b00269
4. Wang W, Gong S, Liu J, Ge Y, Wang J, Lv X (2021) Ag-Cu aerogel for electrochemical CO<sub>2</sub> conversion to CO. *Journal of Colloid and Interface Science* 595:159-167. doi:10.1016/j.jcis.2021.03.120
5. Kuehne TD, Iannuzzi M, Del Ben M, Rybkin VV, Seewald P, Stein F, Laino T, Khaliullin RZ, Schutt O, Schiffmann F, Golze D, Wilhelm J, Chulkov S, Bani-Hashemian MH, Weber V, Borstnik U, Taillefumier M, Jakobovits AS, Lazzaro A, Pabst H, Mueller T, Schade R, Guidon M, Andermatt S, Holmberg N, Schenter GK, Hehn A, Bussy A, Belleflamme F, Tabacchi G, Gloss A, Lass M, Bethune I, Mundy CJ, Plessl C, Watkins M, VandeVondele J, Krack M, Hutter J (2020) CP2K: An electronic structure and molecular dynamics software package - Quickstep: Efficient and accurate electronic structure calculations. *Journal of Chemical Physics* 152 (19). doi:10.1063/5.0007045
6. Perdew JP (1986) DENSITY-FUNCTIONAL APPROXIMATION FOR THE CORRELATION-ENERGY OF THE INHOMOGENEOUS ELECTRON-GAS. *Physical Review B* 33 (12):8822-8824. doi:10.1103/PhysRevB.33.8822
7. Perdew JP, Burke K, Ernzerhof M (1996) Generalized gradient approximation made simple. *Physical Review Letters* 77 (18):3865-3868. doi:10.1103/PhysRevLett.77.3865
8. Grimme S, Antony J, Ehrlich S, Krieg H (2010) A consistent and accurate ab initio parametrization of density functional dispersion correction (DFT-D) for the 94 elements H-Pu. *Journal of Chemical Physics* 132 (15). doi:10.1063/1.3382344
9. Goedecker S, Teter M, Hutter J (1996) Separable dual-space Gaussian pseudopotentials. *Physical Review B* 54 (3):1703-1710. doi:10.1103/PhysRevB.54.1703
